# Supplementary material for: Optogenetic strategies for high-efficiency all-optical interrogation using blue-light-sensitive opsins
Source: eLife. 2021 May 25;10:e63359. doi: 10.7554/eLife.63359 (PMC8177884; doi:10.7554/eLife.63359)
Supplement: Figure 1—source data 1. [file elife-63359-fig1-data1.xlsx]

## Sheet: Sheet1
1P full-field photocurrent (pA) @ 0.2707 mW/mm2					Construct	Cell #	Distance from soma along neurites (µm)	2P photocurrent (pA) @ 15 mW		Construct	Cell #	Distance from soma along neurites (µm)	2P photocurrent (pA) @ 15 mW	2P photocurrent (pA) @ 40 mW		Construct	Cell #	Distance from soma along neurites (µm)	2P photocurrent (pA) @ 15 mW			Soma to full-field photocurrent ratio
stCoChR	soCoChR	CoChR			stCoChR	1	0	553.232		soCoChR	1	0	8.11827			CoChR	1	0	641.936			CoChR	stCoChR	soCoChR	soCoChR @ 40 mW
4115.1	57	3088.5					168.378	2.34983				20.767	1.92629					19.869	131.715			0.207847	0.13444	0.142426	NA
3788.8	86.3	4905					145.678	5.64033				47.936	0.655296					41.54	156.915			0.330625	0.519854	0.15363	0.214222
1850.1	63.1	2615.1					119.385	3.54052				71.089	1.20701					60.138	101.724			0.164843	0.327419	0.158405	0.261994
4677	111.6	2984.3					100.445	18.209				114.073	2.53599					84.653	74.2713			0.0984551	0.565812	0.0578903	0.101739
4398	160.4	7091					73.207	32.7584				115.842	0.444166					102.091	64.5298			0.0742117	0.841841	0.180493	0.211991
1968	80.2	1254.3					50.026	42.3062				145.375	0.448873					135.755	48.9498			0.099054	0.633888	0.042345	0.132985
3320.5	68.1	3729					23.753	106.176				181.539	1.33537					158.573	32.9026			0.452744	0.692973	0.103266	0.164014
2528	69.1	1175.8					28.293	71.1689				210.635	0.831698					202.786	24.2875			0.175699	0.387137	0.091873	0.120799
4890	75.6	4776					46.615	51.9455				239.795	0.709125					207.479	18.2263			0.167434	0.550634	0.176791	0.292584
1997	110.2	2160					31.085	99.9112				90.256	1.91393					46.273	117.088			0.0505699	0.662417	0.386285	0.468792
5572	128.5	3476.7					51.256	57.6428				114.883	0.331091					71.48	108.903			0.213299
4843		5083					27.619	124.042				142.206	2.0423					93.844	82.9986
2045.4		1563.5					50.834	59.5309				168.425	1.18236					122.5	74.4246
5940		2246.4					78.45	48.3933				209.126	1.95633					146.334	51.8883			τdecay (µm) of photocurrent with distance from soma along neurites
							102.487	28.9033				231.202	0.961817					169.097	38.4138			CoChR		stCoChR		soCoChR		soCoChR @ 40 mW
Comments for 1P full-field stimulation:							132.639	16.5625				61.869	2.35485					191.348	42.6642			τdecay	Adjusted r2	τdecay	Adjusted r2	τdecay	Adjusted r2	τdecay	Adjusted r2
* Cell order is the same as for 2P spiral stimulation.							157.679	5.64477				94.509	2.30302					214.597	25.0461			29.4869	0.385113	18.4723	0.998504	35.9068	0.0228742	NA	NA
* Red are cells where there was no 2P spiral stimulation.							190.541	4.92124				99.966	0.908525					24.098	158.776			13.7152	0.869385	11.7787	0.996698	13.5605	0.873071	10.7669	0.917007
							198.563	3.85063				27.254	0.675197					51.575	164.551			15.7507	0.753158	19.2689	0.994498	20.2619	0.884223	14.1811	0.918305
						2	0	1969.62				49.831	2.16861					80.468	92.792			27.3101	0.998568	18.0055	0.947105	14.6444	0.601052	11.4109	0.899699
							19.024	391.694				70.109	2.59666					103.291	81.2892			54.5609	-0.0879809	7.16316	0.99991	10.444	0.650181	10.7841	0.730938
							40.056	120.77				94.582	0.351158					130.393	81.9154			49.1031	0.123517	17.2756	0.9463	63.3016	0.287131	16.3648	0.739231
							65.681	82.9115				28.646	3.10282					84.454	102.579			18.3991	0.874364	29.2979	0.99443	58.5477	0.162205	36.346	0.133759
							85.383	78.3244				49.565	0.898209					100.547	83.3918			51.9439	-0.53831	15.4173	0.996176	29.2238	0.239216	30.4534	0.516211
							124.595	17.1635				65.078	1.32246					124.684	64.3685			26.599	0.672113	13.1372	0.863814	13.8401	0.895493	13.9096	0.920502
							14.754	212.994				90.822	1.84418					40.357	149.05			84.1606	-0.366782	11.3732	0.957343	11.8676	0.895195	10.1813	0.899988
							29.692	197.485				25.557	3.34353					61.954	89.9514			18.1497	0.738634
							36.641	135.467				44.721	2.2367					71.802	80.9498
						3	0	1531.34				75.232	2.02145					90.706	66.652			* Note that for some of the fits, r2 is low or even negative, because the fit was forced to decay to 0, as expected biologically.
							18.544	477.704				67.51	1.1666					126.362	61.1207			See examples for high and low r2 values below:
							34.4	289.679				94.839	2.29564					64.34	81.527
							61.811	144.468				112.388	1.90975					87.294	68.4924
							82.958	162.653				129.037	3.51727					106.233	123.838
							107.787	103.713			2	0	13.2583	18.4873				138.567	101.242
							137.741	54.3805				20.438	1.57068	2.77003				146.796	83.1935
							24.668	453.349				44.835	0.999273	1.26599				42.827	62.576
							52.8	137.156				71.587	1.79574	0.119591				66.845	64.9235
							80.309	92.4935				94.616	0.76109	3.25073				89.802	63.8244
							92.164	94.8977				119.351	1.14173	1.43458				109.246	48.1694
							113.859	81.2327				143.136	1.05051	1.75169				129.36	46.89
							43.732	158.275				163.11	1.21729	1.14531				28.457	88.9419
							54.219	114.593				74.242	1.01654	0.786201				49.869	93.3265
							15.887	291				87.975	1.02209	1.31177				71.506	75.2999
							24.299	167.717				25.362	2.04284	1.72026				90.186	58.5757
							43.778	157.869				44.466	1.72719	0.92594				116.786	54.9783
							62.511	54.311				60.955	2.10985	1.51545				140.11	41.6234
							73.67	63.7803			3	0	17.6779	29.2386				29.468	105.275
						4	0	2488.44				20.57	3.73005	3.88506				46.983	68.7461
							29.248	575.893				37.22	5.47677	4.38109				71.428	91.1527
							36.821	267.704				109.3	1.87483	4.75358				94.39	93.352
							55.408	151.831				41.505	2.2794	1.56627				30.081	98.8486
							77.269	125.259				33.086	1.04837	1.61414				59.168	74.913
							103.746	100.536				56.857	0.605736	1.11941				83.246	36.6872
							131.958	94.5036				84.771	1.02585	1.45485				104.815	40.7713
							153.532	77.1249				100.815	0.534777	1.73855				42.602	71.4802
							177.506	65.4239				140.987	1.04831	1.12118				104.211	56.391
							201.399	39.601				160.156	0.936604	1.17338				121.481	51.7034
							115.348	65.4524				185.66	1.00859	1.77635				138.578	42.1865
							139.137	37.3713				52.828	1.92064	1.68484				160.069	42.3169
							156.315	15.6737				41.162	2.28861	3.35379				177.85	39.8064
							47.723	161.465				63.003	1.49108	2.51638				195.685	30.9762
							72.474	167.614				81.169	1.50512	0.377626			2	0	1621.71
							99.022	114.668				90.974	1.22231	1.05268				25.586	142.702
							118.179	103.592			4	0	9.2856	16.3189				47.07	153.74
							138.883	89.1938				21.298	2.16868	1.6343				66.607	216.955
							165.419	24.3703				45.589	0.414502	2.24795				86.249	104.769
							195.07	21.2461				67.597	1.20922	1.11511				103.934	94.4927
							218.067	17.141				84.405	1.6404	1.22506				129.308	64.4417
							20.04	470.512				106.171	1.06881	0.871941				94.691	124.906
							34.726	361.688				123.392	1.38792	1.07589				28.975	112.288
							70.178	317.821				142.011	0.787671	0.701476				55.626	136.233
							74.368	150.729				153.156	2.03264	0.602658				77.4	137.387
						5	0	1656.74				172.251	0.715528	0.581759				94.564	102.393
							19.353	102.56				191.26	0.816389	0.628357				113.738	102.718
							40.759	3.65808				208.762	0.627828	1.05285				49.728	145.67
							70.051	1.84384				232.432	1.47622	1.29077				50.592	28.3593
							98.721	0.530089				39.48	1.74845	1.38147				73.679	15.6473
							123.249	1.80287				66.224	1.02631	0.992907				98.689	8.78159
							53.861	1.45773				79.454	1.13891	0.714786				122.521	4.75624
							76.849	4.48482				113.176	1.4073	0.459164				147.147	4.29326
							136.531	1.65273				132.729	0.708438	0.570448				169.955	2.95158
							25.289	130.074				162.977	1.00217	1.49788				22.689	310.114
							51.713	2.5881				149.677	0.480988	0.829299				50.161	168.864
							70.258	1.28056				181.394	1.15015	0.790746				77.374	160.376
							87.834	1.2784				23.573	0.95476	2.06781				99.595	121.054
							45.451	1.70074				44.745	2.27795	1.74426				126.933	104.911
							59.658	1.81533				46.577	0.255953	1.29977				49.482	177.544
							78.509	3.83627			5	0	14.4755	17.0017				83.191	168.207
							94.372	6.05966				18.244	1.66609	1.7156				111.335	121.93
							133.756	2.24422				36.508	1.99469	1.53885				141.015	100.682
							18.285	129.021				19.186	1.82069	2.50311			3	0	431.081
							31.656	60.1263				19.553	3.07101	2.77371				15.287	124.229
							47.902	2.06082				38.299	1.37348	1.20767				33.392	51.7411
							66.879	5.8512				78.897	3.77322	1.89374				60.465	47.6872
							83.253	4.05247				72.949	1.01094	1.86921				79.735	53.6207
							99.385	4.35703				90.06	1.62171	2.32759				102.053	30.2906
							119.918	7.07688				112.097	3.6202	2.57717				107.848	30.712
							136.214	6.00075				129.634	0.487283	2.0026				129.869	33.2882
							25.805	24.5727				37.735	1.92949	2.21291				35.223	45.9732
							52.067	1.85303				97.849	2.12655	2.59178				52.234	73.6815
							74.706	1.5467				96.079	1.302	1.25352				74.894	35.9329
							100.554	1.14599				109.195	0.837585	2.24535				98.589	33.0664
							37.807	1.24313				140.682	0.89469	1.17819				126.116	26.0937
							62.1	1.20572				148.253	1.25858	2.25941				12.505	119.916
							85.848	1.44592				27.387	1.05147	1.69292				37.162	52.7126
							107.868	1.46812				55.448	1.22734	1.64169				58.815	39.9004
							127.385	3.66935				81.622	2.25381	1.24284				76.203	32.7318
						6	0	2104.82				109.852	0.860034	1.41437				116.343	37.9681
							22.967	650.933				133.837	0.922735	0.832126				119.507	39.9869
							43.001	269.596				142.125	1.68642	1.92719				142.835	28.3771
							58.926	153.63				162.241	1.42087	1.17844				166.388	26.3081
							39.987	127.033			6	0	2.88369	9.05628				184.452	30.8184
							65.716	132.4				21.902	2.26703	1.65749				37.927	61.4943
							85.253	76.3793				46.115	0.905156	0.336669				61.537	63.8106
							110.322	53.7443				63.746	1.41028	1.35938				85.536	52.8822
							130.069	37.3077				83.038	0.212948	1.50211				94.588	52.2561
							152.077	19.5019				130.456	0.790494	1.57837				52.436	51.3854
							176.625	8.85784				122.236	1.22092	0.583571				70.756	37.062
							21.956	324.782				145.593	1.11977	0.739651			4	0	293.82
							43.022	117.533				23.132	2.00102	0.662903				25.546	116.849
							71.91	77.4037				48.034	2.36992	1.44295				44.457	45.5345
							43.412	170.557				73.808	0.664677	1.40751				67.581	26.4675
							71.104	113.954				20.487	0.889511	2.58976				89.089	19.7626
							27.546	137.355				34.847	1.19471	2.69031				114.835	13.3589
							48.68	127.915				43.839	1.39521	1.42416				39.159	63.0644
						7	0	1751.83				65.409	0.834681	0.827569				55.647	38.5173
							16.89	456.092				85.639	1.31134	0.662839				72.483	22.2907
							69.788	272.69			7	0	7.13566	11.3334				93.949	16.3
							57.507	227.703				21.384	2.86038	6.39217				33.283	82.4486
							72.422	248.489				16.673	6.55204	2.41917				59.086	33.7656
							70.243	106.324				41.687	2.42124	2.4028				82.106	19.7131
							93.389	119.692				60.371	1.57998	1.06919				35.275	40.801
							110.498	112.336				90.599	1.55475	2.2317				62.372	15.5701
							135.125	114.078				102.981	1.63914	1.50734				65.535	29.2635
							154.394	106.883				128.393	0.50678	1.04467				45.953	35.1051
							173.278	79.0729				146.556	0.532407	2.34279				74.254	21.8864
							194.212	84.638				170.654	2.35628	2.02893			5	0	526.235
							212.632	74.076				20.813	4.13889	4.13866				28.892	262.6
							239.49	69.4259				44.227	3.87326	2.7115				45.775	226.331
							257.175	58.6277				65.272	2.10689	2.75561				70.686	209.83
							33.848	551.763				82.498	2.38947	1.17111				89.493	228.296
							42.058	248.829				103.048	2.21377	1.5273				112.821	243.001
							62.036	196.5				121.694	2.9315	3.83227				136.798	237.194
							74.275	153.558				150.951	4.81574	2.86976				158.573	276.64
							99.006	120.851				175.164	2.3612	2.71154				171.678	168.191
							127.253	98.559				196.51	0.619979	1.77505				114.542	251.211
							151.681	86.9944				33.53	3.01887	2.19657				131.066	133.293
						8	0	2157.13				49.879	4.58969	2.50375				136.757	106.209
							18.032	222.909				74.047	1.88406	4.32141				93.43	195.954
							41.405	73.1355				97.274	1.50728	3.27343				105.978	140.105
							70.654	10.9997				121.796	5.24243	0.574393				100.112	141.872
							103.876	3.00932				54.389	2.06269	4.29324				116.106	85.7814
							132.424	5.85885				46.504	3.2246	2.40746				138.866	79.6325
							147.554	4.91674				52.519	3.13043	1.0857				153.125	66.8255
							170.466	6.08578				61.465	1.36836	3.57019				42.789	79.5139
							22.624	378.949				79.855	0.976565	2.31226				62.454	101.249
							30.091	306.361			8	0	6.9456	9.13242				85.341	78.1593
							46.021	156.973				28.156	1.81292	3.63193				100.575	81.0408
							65.332	123.778				55.588	0.0836927	2.20059				121.069	103.593
							18.733	515.692				80.784	0.443464	1.27366				150.814	49.405
							38.008	337.412				110.641	0.666137	0.809929				173.786	60.2606
							58.607	253.316				131.874	1.32039	1.66885				30.511	132.061
							79.219	178.716				154.532	0.626	2.57578				61.498	132.25
							97.691	67.015				26.244	1.18346	1.79664				84.463	80.4483
							112.72	44.2339				50.58	0.901163	1.64731				113.789	70.0368
							129.007	41.464				65.814	1.38682	0.402108				133.094	45.8958
							144.257	39.6774				19.255	0.79684	2.20651				31.768	157.62
							158.396	37.2059				41.823	1.66027	1.21633				46.96	78.8248
							23.396	570.6				47.92	1.69093	0.738053				57.732	124.96
							37.656	485.563				70.533	0.658705	1.99882				80.371	143.538
							57.906	282.141				88.522	0.504869	2.45221				96.028	81.485
							74.186	266.568				107.27	1.77296	1.06509				121.948	69.3539
							94.467	256.687				125.791	3.45274	1.43907				136.305	37.594
							117.736	190.002				144.072	0.626507	0.751154				37.649	98.8634
							129.758	137.92				162.48	0.820382	0.580875				66.259	106.662
							153.203	82.8753				185.091	1.07201	0.932282				90.047	113.575
							180.934	45.156				61.747	1.33767	1.20231				117.001	65.1967
							197.816	24.4942				89.038	1.33812	0.782448				146.345	63.386
							224.57	13.178			9	0	19.4823	32.2428				172.93	39.1924
							253.139	22.4233				14.563	7.68062	11.3172				200.933	37.4669
							253.47	22.4941				28.707	2.44812	3.83933				110.415	154.172
							223.316	26.4524				46.753	1.50885	2.44798				134.986	58.6868
							242.52	21.2525				16.717	3.01261	6.02025				79.261	95.1027
							261.026	17.4472				35.75	2.25612	2.8935				135.937	50.8414
							36.995	558.843				54.209	1.74524	2.74171				172.482	40.203
							39.144	166.779				71.188	1.71377	3.04897				190.423	36.4322
							64.951	40.4894				28.195	2.20051	3.73025				37.611	94.076
							83.558	33.4257				44.234	2.46406	3.00762				61.311	51.5779
							102.031	39.667				59.377	1.80947	2.49622				87.221	68.2978
						9	0	1126.27				20.703	1.43392	5.57282				112.723	58.2579
							14.722	367.245				38.39	2.05756	2.79466				138.949	53.0369
							28.135	247.704				63.172	1.7932	2.82966			6	0	369.373
							49.113	114.88				61.442	1.52451	2.94775				25.52	378.399
							72.909	88.2989				32.044	1.56564	5.97813				46.002	191.862
							93.348	96.7388				65.98	0.825353	2.90809				66.895	188.011
							109.361	72.0998				66.38	0.312254	1.37687				84.445	147.772
							123.657	91.1751			10	0	49.6376	60.2398				105.847	128.188
							146.437	56.5053				14.002	11.7717	15.0962				129.591	154.799
							162.604	39.7728				35.206	4.73575	10.674				22.854	45.9501
							182.283	39.0459				53.733	2.91096	4.19235				44.995	102.497
							204.577	25.7908				72.89	3.6019	2.21888				64.755	78.3489
							21.114	95.8584				92.247	2.97471	3.2458				88.328	61.1285
							61.736	74.473				124.857	2.00006	2.37215				109.878	54.9184
							60.02	67.5759				137.287	1.89574	1.35318				129.919	55.1799
							79.351	68.9847				13.626	6.14061	9.35522				150.389	53.7362
							98.659	83.7604				32.237	3.28169	2.97697				22.65	114.641
							121.403	45.7908				51.268	3.17035	2.80527				42.923	95.5879
							141.045	32.7977				30.84	3.03959	3.21175				21.487	140.743
							163.588	50.8636				42.236	2.29838	4.39426				36.118	76.4829
							185.146	34.3286				54.795	4.29885	2.91821			7	0	2162.3
							60.708	90.8908				75.42	2.05307	3.50247				17.76	644.792
							79.65	92.5876				80.599	3.55846	4.70682				32.962	360.477
							96.443	89.4969				105.983	2.56502	2.59719				45.354	267.04
							115.767	79.2159				124.602	1.94987	2.23948				63.335	161.942
							142.117	80.6932				55.401	4.58083	7.9859				43.379	406.331
							163.215	84.5567				57.556	2.83716	2.79422				60.137	259.016
							179.925	87.5245				76.238	2.56491	4.10948				22.848	959.06
							194.905	61.7122				105.346	1.12711	1.77052				53.444	477.363
							212.218	56.9495				19.321	10.0426	9.03075				68.522	142.021
							233.983	54.4316				38.566	3.78526	4.26252				95.72	68.4922
						10	0	3934.76										115.608	43.609
							19.303	369.988										25.231	257.436
							37.072	61.6611										35.829	197.844
							17.798	875.754										19.299	534.376
							29.828	613.67										39.617	204.809
							60.329	377										58.817	117.033
							61.664	188.009										100.875	68.8808
							69.347	99.2515									8	0	379.509
							80.266	99.5272										51.425	163.611
							96.177	88.7314										47.549	171.056
							107.86	69.6834										67.449	148.838
							18.422	551.878										94.7	183.12
							49.948	201.303										125.769	163.692
							49.311	143.271										156.033	173.981
							67.757	146.515										188.395	146.503
							87.821	60.4652										218.831	122.827
							53.769	126.209										244.326	99.2901
							76.357	78.0358										266.788	84.1029
							93.354	101.441										283.803	99.5532
							111.12	69.5848										301.895	70.5646
							131.924	37.2649										317.883	67.5195
							27.029	365.422										246.025	77.9353
							52.714	201.138										271.641	119.998
							71.722	124.828										290.346	60.8003
							92.587	97.1907										29.404	64.3329
							110.639	49.044										38.986	69.7659
							127.1	49.7303										58.901	55.2342
																		88.987	55.7762
																		110.037	45.6265
																		131.702	44.9531
																		140.314	99.486
																		154.011	55.479
																		67.928	134.245
																		90.368	87.612
																		125.778	67.0723
																		131.742	43.5748
																		155.426	28.7179
																		24.357	174.45
																		42.862	50.8028
																		100.607	47.765
																		40.124	61.318
																		46.781	40.7536
																		63.784	43.5166
																		84.788	38.8104
																	9	0	851.069
																		22.727	207.108
																		33.802	216.467
																		53.229	78.8866
																		71.369	82.0325
																		97.845	70.2646
																		51.428	191.787
																		70.801	166.418
																		92.001	168.227
																		116.429	125.019
																		138.363	91.0173
																		166.42	104.971
																		187.48	78.8984
																		139.694	48.6543
																		159.979	51.0043
																		21.63	394.041
																		45.618	148.081
																		68.145	117.548
																		87.836	77.8875
																		109.754	66.3015
																		46.229	103.468
																		27.27	194.496
																		35.827	129.809
																		51.055	218.065
																		70.877	80.2663
																		92.949	60.5511
																		27.016	122.254
																		50.743	126.316
																		74.782	160.12
																		95.655	101.276
																		116.606	56.8635
																		38.859	151.979
																		59.187	124.568
																		79.27	106.392
																		96.026	110.231
																		112.526	62.1359
																		135.934	51.1945
																	10	0	79.0661
																		31.777	44.816
																		48.613	26.0879
																		68.363	29.2707
																		87.57	42.9213
																		108.265	44.972
																		125.653	41.0389
																		140.798	37.0479
																		164.486	47.3614
																		181.694	29.6671
																		204.216	27.1413
																		105.761	30.7814
																		128.533	20.6583
																		138.424	21.7408
																		156.884	20.0678
																		173.867	26.0306
																		194.117	14.5576
																		229.887	16.3512
																		235.412	18.4191
																		40.644	29.4715
																		61.123	26.2626
																		78.818	20.4685
																		96.202	24.356
																		116.116	21.7603
																		136.937	18.8986
																		154.852	14.2682
																		20.83	24.6523
																		38.031	25.3902
																		51.136	18.3533
																		28.797	57.9935
																		32.225	27.6943
																		61.366	26.3767
																		82.937	24.9748
																		103.941	19.6528
																		125.448	16.5888
																		28.604	50.5601
																		44.207	18.4891
																		70.026	34.057
																		95.397	16.0294
																		119.958	19.1595
																		141.812	14.6621
																		166.172	13.0524
																	11	0	479.155
																		21.294	112.045
																		43.238	49.7342
																		67.274	43.3449
																		89.071	33.5082
																		111.109	30.9668
																		132.423	35.08
																		153.989	30.6425
																		25.941	114.748
																		42.371	64.8497
																		63.077	51.1336
																		85.428	37.4079
																		112.079	37.7797
																		38.52	43.3353
																		63.392	39.4922
																		94.886	34.8018
																		127.446	36.5767
																		164.493	38.4912
																		192.698	27.1477
																		211.274	24.9917
																		25.114	99.8685
																		49.474	63.1368
																		71.361	103.695
																		94.897	64.4567
																		121.585	30.8198
																		57.853	78.5264
																		77.534	86.8806
																		20.89	55.4856
																		39.38	43.971
																		55.861	39.083
