# Supplementary material for: Optogenetic strategies for high-efficiency all-optical interrogation using blue-light-sensitive opsins
Source: eLife. 2021 May 25;10:e63359. doi: 10.7554/eLife.63359 (PMC8177884; doi:10.7554/eLife.63359)
Supplement: Figure 2—source data 1. [file elife-63359-fig2-data1.xlsx]

## Sheet: Fig2D
Fig2D upper panel			Fig 2D bottom panel
Spike time (ms)	Sweep #		Spike count:	Bin start (ms)	Bin end (ms)	# of APs
1700.14	1			1556.24	1561.24	0
1711.78	1			1566.24	1571.24	0
1756.44	1			1576.24	1581.24	0
1673.2	2			1586.24	1591.24	0
1680.22	2			1596.24	1601.24	0
1691.84	2			1606.24	1611.24	0
1707.74	2			1616.24	1621.24	0
1717.3	2			1626.24	1631.24	0
1729.62	2			1636.24	1641.24	0
1667.84	3			1646.24	1651.24	0
1678.1	3			1656.24	1661.24	0		The cells highlighted correspond to time bins in which the stimulation was on. 1656.24 - 1756.24 = 100 ms stimulation
1683.92	3			1666.24	1671.24	3
1690.68	3			1676.24	1681.24	16
1697.76	3			1686.24	1691.24	12
1675.38	4			1696.24	1701.24	13
1681.2	4			1706.24	1711.24	6
1686.82	4			1716.24	1721.24	7
1693.44	4			1726.24	1731.24	1
1701.8	4			1736.24	1741.24	2
1713.08	4			1746.24	1751.24	0
1673	5			1756.24	1761.24	2
1678.28	5			1766.24	1771.24	0
1683.86	5			1776.24	1781.24	0
1689.78	5			1786.24	1791.24	0
1696.4	5			1796.24	1801.24	0
1704.56	5			1806.24	1811.24	0
1715.3	5			1816.24	1821.24	0
2942.86	5			1826.24	1831.24	0
1670.18	6			1836.24	1841.24	0
1678.92	6			1846.24	1851.24	0
1686.4	6			1856.24	1861.24	0
1693.04	6
1700.44	6
1714.6	6
1740.2	6
3276	6
1671.8	7
1677.52	7
1683.66	7
1692.4	7
1707.16	7
1758.72	7
1672.6	8
1683.08	8
1689.02	8
1695.96	8
1703.86	8
1714.18	8
1731.8	8
1674.58	9
1680.12	9
1686.52	9
1696.6	9
1705.72	9
1670.34	10
1679.3	10
1686.66	10
1693.22	10
1700.72	10
1714.44	10

## Sheet: Fig2E
Cell #	Firing rate (Hz)
	Pre	Stim	Post
Cell_1	0	59.997	0
Cell_2	0	60.497	0.15
Cell_3	1.2	25.999	4.2
Cell_4	2.31	88.43	1.84
Cell_5	0	32.498	0
Cell_6	0	58.747	0.125
Cell_7	0.1	42.998	0
Cell_8	1	38.12	1.19
Cell_9	5.6667	48.887	4.4444
Cell_10	0.86	31.78	0.82
Mean	1.11367	48.7953	1.27694
SEM	0.5601	5.92052	0.54364

## Sheet: Fig2F
Cell #	stCoChR					stChR2
	Delta firing rate (Hz)					Delta firing rate (Hz)
	10 mW	20 mW	30 mW		Cell #	10 mW	30 mW
Cell_1	39	59.997	79.994		Cell_1	0.01	2.5
Cell_2	31	60.497	114.99		Cell_2	-0.11	2.5
Cell_3	12.2622	24.799	34.3307		Cell_3	0.81	0.2
Cell_4	64.401	86.121	104.85		Cell_4	0.36	0.9
Cell_5	12.8	32.498	45.711		Cell_5	0.12	1.3
Cell_6	27.5	58.747	62.9947		Cell_6	0.57	0.4
Cell_7	20.8	42.898	62.495		Cell_7	2.01	13
Cell_8	6.2004	37.124	56.8537		Cell_8	3.12	10
Cell_9	18.801	43.2203	36.122
Cell_10	0.8001	30.9274	43.497
Mean	23.3565	47.6829	64.1838		Mean	0.86125	3.85
SEM	5.84037	5.87371	8.81339		SEM	0.40039	1.71974

## Sheet: Fig2G
Cell #	Prob spikes 10 mW					Prob spikes 20 mW					Prob spikes 30 mW					Spontaneous probability of AP
	10 ms	20 ms	30 ms	50 ms	100 ms	10 ms	20 ms	30 ms	50 ms	100 ms	10 ms	20 ms	30 ms	50 ms	100 ms	10 ms	20 ms	30 ms	50 ms	100 ms		Spontaneous pobability was calculated for each condition and then averaged
Cell_1	0	0	0.4	1	1	0	1	1	1	1	0.75	1	1	1	1	0	0	0	0	0
Cell_2	0	0	0.1	0.9	1	0	1	1	1	1	1	1	1	1	1	0	0	0	0	0
Cell_3	0	0.153844	0.230768	0.384613	0.538462	0.1	0.1	0.2	0.4	0.6	0	0.33333	0.66667	0.83333	1	0	0	0	0	0
Cell_4	0.9	1	1	1	1	1	1	1	1	1	1	1	1	1	1	0	0	0	0.142857	0.142857
Cell_5	0	0	0	0.5	0.8	0	0.5	1	1	1	0.57143	1	1	1	1	0	0	0	0	0
Cell_6	0	0	0.2	0.7	1	0	1	1	1	1	0.83333	1	1	1	1	0	0	0	0	0
Cell_7	0	0	0.4	0.8	0.8	0.1	0.7	1	1	1	0.875	1	1	1	1	0	0	0	0	0
Cell_8	0	0.2	0.3	0.4	0.6	0.75	0.875	1	1	1	0.71429	1	1	1	1	0	0	0	0	0.142857
Cell_9	0	0	0.5	0.6	0.9	0.33333	0.55556	1	1	1	0.625	1	1	1	1	0	0	0	0.5	0.5
Cell_10	0	0	0	0	0.1	0	0.35714	0.42857	0.714285	0.785715	0	0.5	0.75	1	1	0	0	0	0	0
																0	0	0	0	0
Mean	0.09	0.135384	0.313077	0.628461	0.773846	0.228333	0.70877	0.862857	0.911429	0.938571	0.636905	0.883333	0.941667	0.983333	1	0	0	0	0	0
SEM	0.09	0.0989039	0.0932787	0.10046	0.091988	0.114127	0.101559	0.0930024	0.0635246	0.0432285	0.115155	0.0787639	0.0393815	0.016667	0	0	0	0	0.142857	0.142857
																0	0	0	0	0
																0	0	0	0	0
																0	0	0	0	0
																0	0	0	0	0.1
																0	0	0	0	0.1
																0	0.2	0.3	0.3	0.4
																0	0	0	0	0
																0	0	0	0	0
																0	0	0	0	0
																0	0.1	0.1	0.1	0.3
																0.125	0.125	0.125	0.25	0.25
																0	0	0	0	0
																0	0	0	0	0
																0	0	0	0	0.1
																0.125	0.125	0.125	0.125	0.25
																0	0.111111	0.222222	0.333333	0.555556
																0	0.0714286	0.0714286	0.0714286	0.0714286
															Mean	0.00833	0.02442	0.03146	0.06552	0.10185
															SEM	0.00579	0.00964	0.01339	0.0229	0.02874

## Sheet: Fig2H
Cell #	Latency (ms)			Jitter (ms)
	10 mW	20 mW	30 mW	10 mW	20 mW	30 mW
Cell_1	33.138	14.916	8.4138	5.0312	2.5363	1.4487
Cell_2	36.336	16.2	6.9338	6.8418	2.4665	0.73185
Cell_3	39.037	42.146	33.014	15.8594	30.185	22.891
Cell_4	8.0875	4.79345	3.0081	1.6945	1.4422	0.78729
Cell_5	53.085	18.675	10.591	18.077	4.5734	2.5648
Cell_6	45.016	13.523	8.9441	16.072	1.6742	2.288
Cell_7	32.04	15.675	8.9666	8.0518	4.5771	1.3441
Cell_8	40.141	9.2241	9.0817	28.977	5.5926	2.9985
Cell_9	39.016	15.038	8.9231	18.614	8.0198	3.0821
Cell_10	81.767	32.804	23.258	NaN	17.9995	12.458
Mean	40.7664	18.2995	12.1134	13.2465	7.90666	5.05943
SEM	5.8492	3.49627	2.84037	2.84641	2.91514	2.2573

## Sheet: Fig2I, J
Cell #	Lateral resolution				Axial resolution
	Delta firing rate (Hz)				Delta firing rate (Hz)
	0um	20um	40um	60um	0um	+25um	+50um	+75um	-25um	-50um	-75um
Cell_1	58.4	-1.34	0.13	-2.38	58.4	38.7	2.3	5.73	59.3	41	12
Cell_2					66.5	69.44	14.4	0.6	27.17	6.4	0.5
Cell_3	6	-0.1	0	0
Cell_4	31	1.25	0	0	18	35	35	1	-0.3	0.1	1.9
Cell_5	13.5	4.5	-2	0.9	16.7	2.2	5.4	0	43.8	6.9	2.2
Cell_6	16.6667	17.9	-0.0666666	0	18.4	0.8	-0.272727	-0.1	3	0	0
Cell_7	15	-0.2	-0.2	0	12	9	0	-0.1	0	-0.2	0
Mean	23.4278	3.66833	-0.356111	-0.246667	31.6667	25.8567	9.47121	1.18833	22.1617	9.03333	2.76667
SEM	7.06993	2.70456	0.302786	0.411951	8.97774	10.0273	5.07899	0.845578	9.48008	5.96288	1.72219
