# Supplementary material for: Optogenetic strategies for high-efficiency all-optical interrogation using blue-light-sensitive opsins
Source: eLife. 2021 May 25;10:e63359. doi: 10.7554/eLife.63359 (PMC8177884; doi:10.7554/eLife.63359)
Supplement: Figure 3—figure supplement 1—source data 1. [file elife-63359-fig3-figsupp1-data1.xlsx]

## Sheet: Fig 3-Fig supplement1B
	AP Probability/pulse
	20 Hz	30 Hz	40 Hz	50 Hz
Cell_1_pulse_1	1	0.4	1	1
Cell_1_pulse_2	1	1	1	1
Cell_1_pulse_3	1	1	1	0.8
Cell_1_pulse_4	1	0.8	1	1
Cell_1_pulse_5	1	0.6	1	0.6
Cell_2_pulse_1	0.6	1	0.2	0
Cell_2_pulse_2	1	1	1	1
Cell_2_pulse_3	1	1	1	1
Cell_2_pulse_4	0.2	1	1	1
Cell_2_pulse_5	0.2	1	0.4	0.4
Cell_3_pulse_1	0.6	0.4	0.2	0
Cell_3_pulse_2	0.4	0.8	1	0.6
Cell_3_pulse_3	0.2	1	1	1
Cell_3_pulse_4	0.4	1	1	1
Cell_3_pulse_5	0.6	0.6	0.2	0.2
Cell_4_pulse_1	0	0.2	0.8	0
Cell_4_pulse_2	0.4	0.4	1	0.4
Cell_4_pulse_3	0.4	0.4	1	0.4
Cell_4_pulse_4	0.2	0.6	0.8	0.4
Cell_4_pulse_5	0	0.2	0.4	0.2
Cell_5_pulse_1	0.2	0	0	0.2
Cell_5_pulse_2	0.2	0.2	0.4	0.2
Cell_5_pulse_3	0.2	0.4	0.6	0.6
Cell_5_pulse_4	0.2	0.2	0	0.4
Cell_5_pulse_5	0.2	0.2	0	0.4
Cell_6_pulse_1	0.2	0.6	0.2	0
Cell_6_pulse_2	0.4	0.8	0.2	0.6
Cell_6_pulse_3	0.4	0.4	0.6	0.8
Cell_6_pulse_4	0.6	0.2	0.8	0.6
Cell_6_pulse_5	0.8	0.6	0.2	0.4
Mean	0.48667	0.6	0.63333	0.54
SEM	0.06191	0.05988	0.07052	0.06443

## Sheet: Fig 3-Fig supplement1C
	20 Hz					30 Hz					40 Hz					50 Hz
	Pulse_1	Pulse_2	Pulse_3	Pulse_4	Pulse_5	Pulse_1	Pulse_2	Pulse_3	Pulse_4	Pulse_5	Pulse_1	Pulse_2	Pulse_3	Pulse_4	Pulse_5	Pulse_1	Pulse_2	Pulse_3	Pulse_4	Pulse_5
Cell_1	1	1	1	1	1	0.4	1	1	0.8	0.6	1	1	1	1	1	1	1	0.8	1	0.6
Cell_2	0.6	1	1	0.2	0.2	1	1	1	1	1	0.2	1	1	1	0.4	0	1	1	1	0.4
Cell_3	0.6	0.4	0.2	0.4	0.6	0.4	0.8	1	1	0.6	0.2	1	1	1	0.2	0	0.6	1	1	0.2
Cell_4	0	0.4	0.4	0.2	0	0.2	0.4	0.4	0.6	0.2	0.8	1	1	0.8	0.4	0	0.4	0.4	0.4	0.2
Cell_5	0.2	0.2	0.2	0.2	0.2	0	0.2	0.4	0.2	0.2	0	0.4	0.6	0	0	0.2	0.2	0.6	0.4	0.4
Cell_6	0.2	0.4	0.4	0.6	0.8	0.6	0.8	0.4	0.2	0.6	0.2	0.2	0.6	0.8	0.2	0	0.6	0.8	0.6	0.4
Mean	0.43333	0.56667	0.53333	0.43333	0.46667	0.43333	0.7	0.7	0.63333	0.53333	0.4	0.76667	0.86667	0.76667	0.36667	0.2	0.63333	0.76667	0.73333	0.36667
SEM	0.14981	0.14063	0.15202	0.13081	0.16055	0.14063	0.13416	0.13416	0.14981	0.12293	0.1633	0.14981	0.08433	0.15846	0.14063	0.1633	0.13081	0.09545	0.12293	0.06146
