# Supplementary material for: Optogenetic strategies for high-efficiency all-optical interrogation using blue-light-sensitive opsins
Source: eLife. 2021 May 25;10:e63359. doi: 10.7554/eLife.63359 (PMC8177884; doi:10.7554/eLife.63359)
Supplement: Figure 3—figure supplement 2—source data 1. [file elife-63359-fig3-figsupp2-data1.xlsx]

## Sheet: Fig 3-Fig supplement 2C
Cell #	Low rep. rate laser			High rep. rate laser
	Delta firing rate (Hz)			Delta firing rate (Hz)
	1 mW	3 mW	5 mW	10 mW	20 mW	30 mW
Cell_1	17.6677	75.2342	74.5773	37.3333	69.996	37.996
Cell_2	2.66697	24.5823	24.998	9.0001	32.498	41.3303
Cell_3	2.66697	37.7063	54.996	10.6667	48.569	51.3293
Cell_4	-1.3333	62.219	104.28	0	41.665	82.851
Cell_5	0	27.776	101.99	0	17.142	32.855
Cell_6	17.6677	55.8303	58.995	50.002	61.872	32.6637
Cell_7	3.334	91.106	109.99	34.001	120.62	138.99
Cell_8	0.3334	50.4127	58.3267	18.3343	81.8484	99.2525
Mean	5.37543	53.1084	73.5191	19.9172	59.2763	64.6585
SEM	2.73979	8.15447	10.5452	6.55665	11.4263	13.7066

## Sheet: Fig 3-Fig supplement 2D
Cell #	Low rep. rate laser			Angular coefficient of the fitting line	High rep. rate laser			Angular coefficient of the fitting line
	Delta firing rate (Hz)				Delta firing rate (Hz)
	1 mW	3 mW	5 mW		10 mW	20 mW	30 mW
Cell_1	17.6677	75.2342	74.5773	17.6073	37.3333	69.996	37.996	2.08081
Cell_2	2.66697	24.5823	24.998	5.7544	9.0001	32.498	41.3303	1.41419
Cell_3	2.66697	37.7063	54.996	11.1647	10.6667	48.569	51.3293	1.86995
Cell_4	-1.3333	62.219	104.28	20.1921	0	41.665	82.851	2.37059
Cell_5	0	27.776	101.99	16.9508	0	17.142	32.855	0.948921
Cell_6	17.6677	55.8303	58.995	13.7181	50.002	61.872	32.6637	1.94098
Cell_7	3.334	91.106	109.99	23.6172	34.001	120.62	138.99	4.94436
Cell_8	0.3334	50.4127	58.3267	12.663	18.3343	81.8484	99.2525	3.42706
Mean	5.37543	53.1084	73.5191	2.37461	19.9172	59.2763	64.6585	15.2085
SEM	2.73979	8.15447	10.5452	0.44712	6.55665	11.4263	13.7066	1.97649
		The data reported in the graph are here highlighted

## Sheet: Fig 3-Fig supplement 2E
Cell #	Prob spikes 1 mW					Prob spikes 3 mW					Prob spikes 5 mW					Spontaneous probability of AP
	10 ms	20 ms	30 ms	50 ms	100 ms	10 ms	20 ms	30 ms	50 ms	100 ms	10 ms	20 ms	30 ms	50 ms	100 ms	10 ms	20 ms	30 ms	50 ms	100 ms		Spontaneous pobability was calculated for each condition and then averaged
Cell_1	0	0.1	0.3	0.4	0.6	0.57143	1	1	1	1	1	1	1	1	1	0	0	0.125	0.25	0.25
Cell_2	0	0.5	0.8	0.8	0.9	1	1	1	1	1	1	1	1	1	1	0	0	0	0	0
Cell_3	0	0	0	0	0.2	0	1	1	1	1	1	1	1	1	1	0	0	0	0	0
Cell_4	0	0	0	0	0.4	0.71429	1	1	1	1	0	1	1	1	1	0	0	0	0	0
Cell_5	0	0	0	0	0.2	0	1	1	1	1	0	1	1	1	1	0	0	0	0	0
Cell_6	0	0	0	0.1	0.2	0.25	0.5	0.875	0.875	0.875	0.33333	0.83333	1	1	1	0	0	0	0	0
																0	0.142857	0.142857	0.142857	0.142857
Mean	0	0.1	0.183333	0.216667	0.416667	0.42262	0.916667	0.979167	0.979167	0.979167	0.555555	0.972222	1	1	1	0	0	0	0	0.125
SEM	0	0.0816497	0.132707	0.132707	0.116667	0.166092	0.0833333	0.0208333	0.0208333	0.0208333	0.204879	0.0277783	0	0	0	0	0	0	0	0
																0	0	0	0	0
																0	0	0	0	0
																0	0	0.25	0.25	0.25
																0	0	0	0.1	0.1
																0	0	0	0.1	0.2
																0	0	0	0	0
																0	0	0	0	0
																0	0	0	0	0
																0	0.1	0.1	0.1	0.2
															Mean	0	0.01349	0.03433	0.05238	0.07044
															SEM	0	0.00942	0.01689	0.02029	0.02299

## Sheet: Fig 3-Fig supplement 2F
Cell #	Latency (ms)			Jitter (ms)
	1 mW	3 mW	5 mW	1 mW	3 mW	5 mW
Cell_1	43.283	9.7579	7.0614	30.325	3.4913	1.5793
Cell_2	63.332	21.085	20.987	19.388	6.7914	8.7011
Cell_3	48.319	18.797	10.897	21.48	5.2444	2.7961
Cell_4	NaN	17.03	9.8025	NaN	4.1519	1.5221
Cell_5	NaN	37.985	13.07	NaN	14.411	2.3971
Cell_6	26.399	5.9704	3.6265	24.021	1.2177	0.22387
Cell_7	50.935	11.762	7.8665	38.985	0.88899	0.24191
Cell_8	66.363	9.3224	18.391	16.988	2.2231	0.90834
Cell_9	80.238	16.047	11.712	26.743	1.6987	0.46792
Cell_10	54.728	16.24	14.008	15.076	5.8924	8.4524
Mean	54.1996	16.3997	11.7422	24.1258	4.60109	2.72901
SEM	5.74287	2.82578	1.64602	2.7658	1.26426	1.01218
