# Supplementary material for: Optogenetic strategies for high-efficiency all-optical interrogation using blue-light-sensitive opsins
Source: eLife. 2021 May 25;10:e63359. doi: 10.7554/eLife.63359 (PMC8177884; doi:10.7554/eLife.63359)
Supplement: Figure 3—figure supplement 3—source data 1. [file elife-63359-fig3-figsupp3-data1.xlsx]

## Sheet: Fig 3-Fig supplement 3A
Cell #	Latency (ms)
	1 mW	3 mW	5 mW
Cell_1	61.0175	11.5971	7.63143
Cell_2	81.03	13.756	7.416
Cell_3	29.5	18.686	7.34
Cell_4	NaN	22.102	10.87
Cell_5	29.9	17.34	10.3425
Cell_6	NaN	18.576	9.36
Mean	50.3619	17.0095	8.82665
SEM	12.6095	1.54041	0.642551

## Sheet: Fig 3-Fig supplement 3B
Cell #	Jitter (ms)
	1 mW	3 mW	5 mW
Cell_1	18.0127	2.43654	0.748244
Cell_2	0.07	1.25844	0.39998
Cell_3	0	5.44276	1.47594
Cell_4	NaN	3.59247	1.25786
Cell_5	0	5.3573	2.25395
Cell_6	NaN	5.11932	2.12399
Mean	4.52067	3.86781	1.37666
SEM	4.49737	0.711771	0.300051

## Sheet: Fig 3-Fig supplement 3C
Cell #	Latency (ms)
	1 mW	3 mW	5 mW
Cell_1	43.283	9.7579	7.0614
Cell_2	63.332	21.085	20.987
Cell_3	48.319	18.797	10.897
Cell_4	NaN	17.03	9.8025
Cell_5	NaN	37.985	13.07
Cell_6	26.399	5.9704	3.6265
Cell_7	50.935	11.762	7.8665
Cell_8	66.363	9.3224	18.391
Cell_9	80.238	16.047	11.712
Cell_10	54.728	16.24	14.008
Mean	54.1996	16.3997	11.7422
SEM	5.74287	2.82578	1.64602

## Sheet: Fig 3-Fig supplement 3D
Cell #	Jitter (ms)
	1 mW	3 mW	5 mW
Cell_1	30.325	3.4913	1.5793
Cell_2	19.388	6.7914	8.7011
Cell_3	21.48	5.2444	2.7961
Cell_4	NaN	4.1519	1.5221
Cell_5	NaN	14.411	2.3971
Cell_6	24.021	1.2177	0.22387
Cell_7	38.985	0.88899	0.24191
Cell_8	16.988	2.2231	0.90834
Cell_9	26.743	1.6987	0.46792
Cell_10	15.076	5.8924	8.4524
Mean	24.1258	4.60109	2.72901
SEM	2.7658	1.26426	1.01218
