# Supplementary material for: Optogenetic strategies for high-efficiency all-optical interrogation using blue-light-sensitive opsins
Source: eLife. 2021 May 25;10:e63359. doi: 10.7554/eLife.63359 (PMC8177884; doi:10.7554/eLife.63359)
Supplement: Figure 3—source data 1. [file elife-63359-fig3-data1.xlsx]

## Sheet: Fig3C
Cell #	Low rep. rate laser			High rep. rate laser
	Delta firing rate (Hz)			Delta firing rate (Hz)
	1 mW	3 mW	5 mW	10 mW	20 mW	30 mW
Cell_1	18.9434	85.6452	95.6472	0	44.9486	70.014
Cell_2	4.0008	88.1201	29.0058	1.0002	30.006	37.0074
Cell_3	4.0008	58.2873	29.8591	0.939824	28.5832	25.4618
Cell_4	0	51.0102	30.006	39.0078	37.1503	28.5771
Cell_5	0.577566	70.8935	54.9355	9.70012	54.7091	66.6129
Cell_6	-0.0603763	54.0108	38.7578	43.342	38.9474	31.4349
Mean	4.57704	68.1612	47.2021	15.665	40.2482	43.4228
SEM	2.97494	6.59098	10.6481	8.21333	3.97898	8.10842

## Sheet: Fig3D
Cell #	Low rep. rate laser		Angular coefficient of the fitting line		High rep. rate laser		Angular coefficient of the fitting line
	Delta firing rate (Hz)				Delta firing rate (Hz)
	1 mW	3 mW			10 mW	20 mW
Cell_1	18.9434	85.6452	27.5879		0	44.9486	1.79795
Cell_2	4.0008	88.1201	26.8361		1.0002	30.006	1.22024
Cell_3	4.0008	58.2873	17.8863		0.939824	28.5832	1.16212
Cell_4	0	51.0102	15.6031		39.0078	37.1503	2.55194
Cell_5	0.577566	70.8935	21.3258		9.70012	54.7091	2.38237
Cell_6	-0.0603763	54.0108	16.1972		43.342	38.9474	2.42474
Mean	4.57704	68.1612	20.9061		15.665	40.2482	1.92323
SEM	2.97494	6.59098	2.15563		8.21333	3.97898	0.25474
		The data reported in the graph are here highlighted

## Sheet: Fig3E
Cell #	Prob spikes 1 mW					Prob spikes 3 mW					Prob spikes 5 mW					Spontaneous probability of AP
	10 ms	20 ms	30 ms	50 ms	100 ms	10 ms	20 ms	30 ms	50 ms	100 ms	10 ms	20 ms	30 ms	50 ms	100 ms	10 ms	20 ms	30 ms	50 ms	100 ms		Spontaneous pobability was calculated for each condition and then averaged
Cell_1	0	0	0	0.3	0.8	0.285714	1	1	1	1	1	1	1	1	1	0	0	0	0	0
Cell_2	0	0	0	0	0.2	0	1	1	1	1	1	1	1	1	1	0	0	0	0	0
Cell_3	0	0	0	0	0.1	0	0.6	1	1	1	1	1	1	1	1	0	0	0.1	0.1	0.1
Cell_4	0	0	0	0	0	0	0.3	1	1	1	0.25	1	1	1	1	0	0	0	0	0
Cell_5	0	0	0.1	0.1	0.1	0.1	0.7	1	1	1	0.4	1	1	1	1	0	0	0	0	0
Cell_6	0	0	0	0	0	0	0.7	1	1	1	0.5	1	1	1	1	0	0	0	0	0
																0	0	0	0	0
Mean	0	0	0.0166667	0.0666667	0.2	0.0642857	0.716667	1	1	1	0.691667	1	1	1	1	0	0	0	0	0
SEM	0	0	0.0152145	0.0451335	0.113039	0.043088	0.0983663	0	0	0	0.129323	0	0	0	0	0	0	0	0	0
																0	0	0	0	0
																0	0	0	0.1	0.1
																0	0	0	0	0
																0	0	0	0	0.142857
																0	0	0	0	0
																0	0	0	0	0
																0	0	0	0	0
																0	0	0	0	0
																0	0	0	0	0
															Mean	0	0	0.00556	0.01111	0.01905
															SEM	0	0	0.00556	0.00762	0.01052

## Sheet: Fig3F
Cell #	Latency (ms)			Jitter (ms)
	1 mW	3 mW	5 mW	1 mW	3 mW	5 mW
Cell_1	61.0175	11.5971	7.63143	18.0127	2.43654	0.748244
Cell_2	81.03	13.756	7.416	0.07	1.25844	0.39998
Cell_3	29.5	18.686	7.34	0	5.44276	1.47594
Cell_4	NaN	22.102	10.87	NaN	3.59247	1.25786
Cell_5	29.9	17.34	10.3425	0	5.3573	2.25395
Cell_6	NaN	18.576	9.36	NaN	5.11932	2.12399
Mean	50.3619	17.0095	8.82665	4.52067	3.86781	1.37666
SEM	12.6095	1.54041	0.642551	4.49737	0.711771	0.300051
