# Supplementary material for: Optogenetic strategies for high-efficiency all-optical interrogation using blue-light-sensitive opsins
Source: eLife. 2021 May 25;10:e63359. doi: 10.7554/eLife.63359 (PMC8177884; doi:10.7554/eLife.63359)
Supplement: Figure 4—figure supplement 1—source data 1. [file elife-63359-fig4-figsupp1-data1.xlsx]

## Sheet: Fig 4-Fig supplement 1C
Cell #	AP probability
	50 kHz Rep. rate	100 kHz Rep. rate	500 kHz Rep. rate	1 MHz Rep. rate
	0.25 mW Eq. power	0.5 mW Eq. power	2.5 mW Eq. power	5 mW Eq. power
Cell_1	0.71429	1	1	1
Cell_2	1	1	1	1
Cell_3	0.056	0.2	1	1
Cell_4	0.2	0.2	1	1
Cell_5	0.1	0.77778	1	1
Cell_6	0.35	0.35	0.647058	1
Mean	0.403382	0.587963	0.941176	1
SEM	0.153791	0.156337	0.0588237	0

## Sheet: Fig 4-Fig supplement 1D
Cell #	AP Probability
	50 kHz Rep. rate	1 MHz Rep. rate
	0.25 mW Eq. power	1 mW Eq. power
Cell_1	0.71429	0.6
Cell_2	1	0.9
Cell_3	0.056	0.2
Cell_4	0.2	0.4
Cell_5	0.1	0.2
Cell_6	0.35	0.2
Mean	0.403382	0.416667
SEM	0.153791	0.116667
