# Supplementary material for: Optogenetic strategies for high-efficiency all-optical interrogation using blue-light-sensitive opsins
Source: eLife. 2021 May 25;10:e63359. doi: 10.7554/eLife.63359 (PMC8177884; doi:10.7554/eLife.63359)
Supplement: Figure 4—source data 1. [file elife-63359-fig4-data1.xlsx]

## Sheet: Fig4C
Cell #	AP probability
	50 kHz Rep. rate	100 kHz Rep. rate	500 kHz Rep. rate	1 MHz Rep. rate
	0.25 mW Eq. power	0.5 mW Eq. power	2.5 mW Eq. power	5 mW Eq. power
Cell_1	0	0.3	1	1
Cell_2	0.4	1	1	1
Cell_3	0.3	0.3	1	1
Cell_4	0	0	1	1
Cell_5	0	0.4	1	1
Cell_6	0.1	0.5	1	1
Mean	0.133333	0.416667	1	1
SEM	0.065263	0.123416	0	0

## Sheet: Fig4D
Cell #	AP Probability
	50 kHz Rep. rate	1 MHz Rep. rate
	0. 25 mW Eq. power	1 mW Eq. power
Cell_1	0	0.8
Cell_2	0.4	0.2
Cell_3	0.3	0.1
Cell_4	0	0
Cell_5	0	0.1
Cell_6	0.1	0
Mean	0.133333	0.2
SEM	0.065263	0.113039
