# Supplementary material for: Optogenetic strategies for high-efficiency all-optical interrogation using blue-light-sensitive opsins
Source: eLife. 2021 May 25;10:e63359. doi: 10.7554/eLife.63359 (PMC8177884; doi:10.7554/eLife.63359)
Supplement: Figure 5—figure supplement 1—source data 1. [file elife-63359-fig5-figsupp1-data1.xlsx]

## Sheet: Fig 5-Fig supplement 1C
Cell #	20-25 mW 1100nm scan		20-25 mW 920nm scan
	Firing frequency (Hz) - Spont	Firing frequency (Hz) - Scan	Firing frequency (Hz) - Spont	Firing frequency (Hz) - Scan
Cell_1	2.58	4	2.11	17.68
Cell_2	0.77	3.2	0	12.7
Cell_3	0.13	6.6	0.09	14
Cell_4	0	0	0	9.47
Cell_5	0	0	0	29.8
Cell_6	0.6	6.28	0.08	13.92
Cell_7	0	0	0	34.8
Cell_8	2.53	5.76	0.83	20.92
Mean	0.82625	3.23	0.38875	19.1613
SEM	0.391097	1.02603	0.265467	3.14193
