# Supplementary material for: Optogenetic strategies for high-efficiency all-optical interrogation using blue-light-sensitive opsins
Source: eLife. 2021 May 25;10:e63359. doi: 10.7554/eLife.63359 (PMC8177884; doi:10.7554/eLife.63359)
Supplement: Figure 5—figure supplement 2—source data 1. [file elife-63359-fig5-figsupp2-data1.xlsx]

## Sheet: Fig 5-Fig supplement 2A
	1 AP	2 APs	3 APs	4 APs	5 APs
Cell_1	0.00799955	0.029828	0.0328263	0.0898482	NaN
Cell_2	0.00733386	0.0183007	0.020087	0.0305759	NaN
Cell_3	0.00766676	0.0247403	0.0483135	NaN	NaN
Cell_4	0.0105447	0.023863	0.0379559	0.0514096	NaN
Cell_5	0.00874915	0.0163938	0.0437435	0.0819845	-0.0119302
Cell_6	0.0066455	0.0344977	0.0575495	0.0451951	0.0897335
Cell_7	-0.00369374	0.00949481	0.00833309	0.019625	0.0401639
Cell_8	0.00536706	0.0335304	NaN	NaN	NaN
Mean	0.64637	2.24455	3.55441	5.31064	3.93224
SEM	0.17569	0.31943	0.63753	1.13696	2.93508
