# Supplementary material for: Optogenetic strategies for high-efficiency all-optical interrogation using blue-light-sensitive opsins
Source: eLife. 2021 May 25;10:e63359. doi: 10.7554/eLife.63359 (PMC8177884; doi:10.7554/eLife.63359)
Supplement: Figure 5—figure supplement 3—source data 1. [file elife-63359-fig5-figsupp3-data1.xlsx]

## Sheet: Fig 5-Fig supplement 3A
Cell_#	stCoChR-expressing neurons - 50 mW, 1100nm scan		stCoChR+jRCaMP1a co-expressing neurons - 50 mW, 1100nm scan
	Firing frequency (Hz) - Spont	Firing frequency (Hz) - Scan	Firing frequency (Hz) - Spont	Firing frequency (Hz) - Scan
Cell_1	0.08889	0.44444	0.35556	0.93333
Cell_2	0	0.04444	0.17778	4.36667
Cell_3	0	0.08889	0.66667	1.73333
Cell_4	0	0.17778	0.22222	0.44444
Cell_5	0.02222	0.2	0.05556	1.11111
Cell_6	0	0.09	0.88889	0.84444
Cell_7	0.71111	1.91111	0.08889	1.2
Cell_8	1.02222	6.22222
Mean	0.23056	1.14736	0.35079	1.51905
SEM	0.14229	0.75739	0.11868	0.49704
