# Supplementary material for: Optogenetic strategies for high-efficiency all-optical interrogation using blue-light-sensitive opsins
Source: eLife. 2021 May 25;10:e63359. doi: 10.7554/eLife.63359 (PMC8177884; doi:10.7554/eLife.63359)
Supplement: Figure 5—source data 1. [file elife-63359-fig5-data1.xlsx]

## Sheet: Fig5C
Cell #	30-35 mW 1100nm scan		30 mW 920nm scan
	Firing frequency (Hz) - Spont	Firing frequency (Hz) - Scan	Firing frequency (Hz) - Spont	Firing frequency (Hz) - Scan
Cell_1	0.355556	0.977778	0.333333	0.666667
Cell_2	0.0444444	0.0888889	0	4.66667
Cell_3	0	0	0	9.42222
Cell_4	0	0	0	20.8889
Cell_5	0	0	0	14.3111
Cell_6	0	0	0	1.28889
Cell_7	2.31111	2.08889	2.35556	9.95556
Cell_8	1.42222	2.35556	0.266667	12.3111
Cell_9	0	0	0	12.8
Cell_10	0.311111	0.222222	0.0888889	20.6222
Cell_11	0.977778	2.57778	0.266667	15.7333
Mean	0.492929	0.755556	0.30101	11.1515
SEM	0.231053	0.320381	0.20918	2.07414

## Sheet: Fig5F
Cell #	30-35 mW 1100nm scan		30 mW 920nm scan
	Firing frequency (Hz) - Spont	Firing frequency (Hz) - Scan	Firing frequency (Hz) - Spont	Firing frequency (Hz) - Scan
Cell_1	0.08889	0.04444	0.17778	7.55556
Cell_2	0.47778	1.06667	0.57778	13.9111
Cell_3	1.06667	1.46667	0.26667	8.88889
Cell_4	0.82222	0.31111	0.57778	0.97778
Cell_5	0.26667	0.33333	0.20741	0.59259
Cell_6	0.22222	0.73333	0.17778	8.93333
Cell_7	0.4	0.28889	0.08889	1.73333
Mean	0.47778	0.60635	0.2963	6.08466
SEM	0.13207	0.19188	0.07533	1.91841
