# Supplementary material for: Optogenetic strategies for high-efficiency all-optical interrogation using blue-light-sensitive opsins
Source: eLife. 2021 May 25;10:e63359. doi: 10.7554/eLife.63359 (PMC8177884; doi:10.7554/eLife.63359)
Supplement: Figure 6—figure supplement 1—source data 1. [file elife-63359-fig6-figsupp1-data1.xlsx]

## Sheet: Fig 6-Fig supplement 1C
Cell_#	Firing Freq (Hz)
	Pre	Stim	Post
Cell_1	0	1	0
Cell_2	0.8	1	2.26667
Cell_3	0.2	1	0.26667
Cell_4	0	3	0.93333
Cell_5	0.4	0	0.13333
Cell_6	0	0	0.13333
Cell_7	0	0	0
Cell_8	0	0	0.13333
Cell_9	0.6	0	0.13333
Cell_10	0.6	0	0
Cell_11	3.2	1	3.2
Cell_12	0.2	1	1.2
Cell_13	0	0	0.13333
Cell_14	0	0	0.13333
Cell_15	1.6	1	1.33333
Cell_16	0	0	0
Cell_17	1.6	2	1.06667
Cell_18	0	0	0.13333
Cell_19	0	0	0
Cell_20	0	0	0
Cell_21	0	0	0
Mean	0.4381	0.52381	0.53333
SEM	0.17546	0.17754	0.18789
