# Supplementary material for: Optogenetic strategies for high-efficiency all-optical interrogation using blue-light-sensitive opsins
Source: eLife. 2021 May 25;10:e63359. doi: 10.7554/eLife.63359 (PMC8177884; doi:10.7554/eLife.63359)
Supplement: Figure 6—figure supplement 2—source data 1. [file elife-63359-fig6-figsupp2-data1.xlsx]

## Sheet: Fig 6-Fig supplement 2C
Cell_#	Peak amplitude jRCaMP1a transients (ΔF/F0)
	1 AP	2 APs	3 APs	4 APs	5 APs	6 APs	7 APs	Evoked
Cell_1	0.00814253	0.0438317	0.0473482	0.0634313	NaN	NaN	0.169294	51.6083
Cell_2	0.00806238	0.0228786	0.0227251	0.0174934	0.0546548	NaN	0.0623488	33.1805
Cell_3	0.00699268	0.0252829	0.0351787	NaN	NaN	NaN	NaN	14.0569
Cell_4	0.0103332	0.0242443	0.0282839	0.0495581	0.0671163	0.0775648	NaN	8.23967
Cell_5	0.00895735	0.0179155	0.0964386	0.105603	0.0346866	NaN	0.0930724	7.81905
Cell_6	0.00622818	0.0338029	0.0575495	0.0653704	0.0964509	0.132338	0.0974082
Cell_7	-0.000194301	0.013949	0.0177268	0.032333	0.0212372	NaN	NaN
Cell_8	0.00228328	0.0583744	0.0820289	NaN	NaN	NaN	NaN
Cell_9	0.00547777	NaN	0.0314655	0.0530127	0.0718696	0.073026	NaN
Cell_10	0.00292445	0.00202729	0.0263725	0.0368676	0.0940846	0.0453449	0.0593428
Cell_11	0.0133581	0.0554729	0.029492	0.144472	NaN	NaN	NaN
Mean	0.65969	2.97779	4.31463	6.31268	6.28714	8.20684	9.62933	22.9809
SEM	0.1166	0.57266	0.77041	1.31408	1.06861	1.82064	1.98221	8.51581

## Sheet: Fig 6-Fig suplement 2D
Cell_#	Decay time (s)
	Spont	Evoked
Cell_1	2.11363	1.78971
Cell_2	3.12463	1.89783
Cell_3	1.98335	6.99214
Cell_4	3.36793	0.22207
Cell_5	2.05402	1.22817
Cell_6	3.69163
Cell_7	1.48058
Cell_8	2.56799
Cell_9	0.95166
Cell_10	2.06678
Cell_11	1.04837
Mean	2.22278	2.42598
SEM	0.27085	1.17953
