# Supplementary material for: Optogenetic strategies for high-efficiency all-optical interrogation using blue-light-sensitive opsins
Source: eLife. 2021 May 25;10:e63359. doi: 10.7554/eLife.63359 (PMC8177884; doi:10.7554/eLife.63359)
Supplement: Figure 6—source data 1. [file elife-63359-fig6-data1.xlsx]

## Sheet: Fig6E
FOV	# resp cells	mW/cell	DF/F @1 MHz	DF/F @0.5 MHz	DF/F @0.1 MHz		Power (mW) was measured under the objective at 1MHz
1	3	8	0.338	0.2367	0.1143
		8	0.4107	0.2861	0.1271
		8	0.3037	0.1855	0.05399
2	6	7	0.2279	0.245	0.06444
		7	0.208	0.2363	0.02552
		7	0.2249	0.1755	0.02093
		7	0.2062	0.1364	0.04487
		7	0.2553	0.2744	0.0948
		7	0.09831	0.05826	7.751e-07
3	5	7	0.1687	0.1576	0.08637
		7	0.2081	0.1704	0.1203
		7	0.2713	0.1644	0.115
		7	0.2787	0.2564	0.1694
		7	0.1809	0.1183	0.05046
4	2	9	0.2109	0.1914	0.05988
		9	0.1095	0.1346	0.06648
5	6	5.71429	0.1422	0.1412	0.01816
		5.71429	0.1932	0.1668	0.0351
		5.71429	0.07565	0.04607	0.01089
		5.71429	0.0793	0.007333	0.02909
		5.71429	0.2272	0.2321	0.04282
		5.71429	0.194	0.1482	0.007117
6	6	6.875	0.3216	0.2454	0.1302
		6.875	0.4349	0.429	0.2453
		6.875	0.2668	0.2847	0.1267
		6.875	0.3526	0.3158	0.1159
		6.875	0.3296	0.3202	0.1128
		6.875	0.0597	0.06827	2.152e-08
	Mean	6.9477	0.227781	0.194012	0.0745685
	SEM	0.166411	0.0184329	0.0176572	0.0109612
